# Supplementary material for: Effect of Carotid Artery Stenting on Cognitive Function in Patients with Carotid Artery Stenosis: A Prospective, 3-Month-Follow-Up Study
Source: PubMed Central journal article supplement — J Clin Neurol. 2015 Mar 26;11(2):149–56. doi: 10.3988/jcn.2015.11.2.149 (PMC4387480; doi:10.3988/jcn.2015.11.2.149), 2015-03-26
Supplement: jcn-11-149-s001.pdf [file jcn-11-149-s001.pdf]

**Supplementary Table 1.** Cognitive changes upon 3-month follow-up after carotid artery stenting in patients with post-stent microembolism versus patients without post-stent microembolism as compared to controls

| Neuropsychological test        | Baseline score                     |                                    |                | Difference from baseline           |                                    |                | ANCOVA   |
|--------------------------------|------------------------------------|------------------------------------|----------------|------------------------------------|------------------------------------|----------------|----------|
|                                | Post-stent microembolism (+) (n=5) | Post-stent microembolism (-) (n=4) | Control (n=10) | Post-stent microembolism (+) (n=5) | Post-stent microembolism (-) (n=4) | Control (n=10) | <i>p</i> |
| K-MMSE                         | 24.4±4.4                           | 27.8±1.7                           | 26.5±2.6       | 3.0±4.4                            | -0.5±1.3                           | 1.1±2.2        | 0.488    |
| Digit span-forward             | 7.0±1.6                            | 6.0±1.4                            | 6.5±1.8        | -0.8±0.8                           | 0.8±2.1                            | 0±0.9          | 0.330    |
| Digit span-backward            | 4.4±2.3                            | 3.5±1.3                            | 3.6±1.0        | 0±1.9                              | 0.3±1.5                            | 0±1.2          | 0.776    |
| K-BNT                          | 9.4±3.6                            | 10.5±4.7                           | 12.2±1.4       | 0.2±1.3                            | -0.3±1.3                           | 1.0±1.7        | 0.472    |
| Calculation                    | 9.2±4.8                            | 10.3±2.9                           | 9.9±2.8        | 2.8±4.8                            | 0.8±1                              | -0.1±0.7       | 0.061    |
| ROCFT                          | 25.6±15.2                          | 34.3±2.4                           | 32.2±6.8       | 2.8±5.4                            | 0±2.7                              | 0.8±2.8        | 0.723    |
| Orientation                    | 5.6±0.9                            | 6.0±0                              | 5.7±0.5        | 0.4±0.9                            | -0.3±0.5                           | 0.3±0.5        | 0.221    |
| SVLT free recall               | 15.4±8.4                           | 13.8±7.9                           | 20.4±6.4       | -0.4±6.2                           | 7.3±6.4                            | 2.8±5.0        | 0.075    |
| SVLT delayed recall            | 4.2±3.3                            | 4.3±3.4                            | 5.6±3.7        | 0.2±2.6                            | 1.8±1.5                            | 1.7±2.3        | 0.351    |
| SVLT recognition               | 6.4±4.5                            | 7.0±4.2                            | 8.4±1.6        | 0.6±4.8                            | 2.0±1.8                            | 1.7±1.8        | 0.159    |
| ROCFT-immediate/delayed recall | 28.8±17.6                          | 39.5±14.3                          | 31.4±17.0      | 5.8±4.8                            | 2.9±17.6                           | 7.0±7.5        | 0.897    |
| ROCFT-recognition              | 6.6±5.4                            | 7.8±1.9                            | 7.3±2.5        | -0.8±2.2                           | 0.8±2.1                            | 1.2±2.7        | 0.266    |
| Contrasting program            | 2.4±1.3                            | 3.0±0                              | 2.8±0.6        | 0.6±1.3                            | 0±0                                | 0.2±0.6        | -        |
| Go-no-go                       | 2.4±1.3                            | 2.5±1                              | 2.6±0.5        | 0.4±1.5                            | 0.3±0.5                            | -0.1±0.6       | 0.657    |
| Fist-edge-palm                 | 2.2±1.3                            | 3.0±0                              | 3.0±0          | 0.4±0.5                            | 0±0                                | 0±0            | 0.560    |
| Luria loop                     | 2.4±1.3                            | 3.0±0                              | 2.7±0.7        | 0±0                                | 0±0                                | 0.3±0.7        | 0.275    |
| Word fluency-animal            | 11.2±6.5                           | 11.3±4.4                           | 13.5±2.7       | -0.4±3.7                           | 2.0±7.6                            | 0.6±2.5        | 0.603    |
| Word fluency-phonemic          | 5.2±3.1                            | 5.0±4.3                            | 6.5±2.8        | -0.6±2.5                           | 2.8±4.2                            | -1.1±3.5       | 0.260    |
| Stroop test-color              | 10.2±7                             | 13.5±1.7                           | 15.7±2.9       | 1.9±4                              | 0±6.7                              | 1.1±3.0        | 0.723    |
| SNSB-D                         | 161.6±79.3                         | 187.0±38.4                         | 193.0±37.8     | 12.9±28.2                          | 20.9±43.2                          | 17.3±12.2      | 0.602    |

ANCOVA: analysis of covariance, K-BNT: Korean version of the Boston Naming Test, K-MMSE: Korean version of the Mini Mental State Examination, ROCFT: Rey-Osterrieth Complex Figure Test, ROCFT-immediate/delayed recall: immediate/delayed recall domain of the ROCFT, ROCFT-recognition: recognition domain of the ROCFT, SNSB-D: Seoul Neuropsychological Screening Battery-Dementia Version, SVLT: Seoul Verbal Learning Test.
