# Supplementary material for: Effect of Carotid Artery Stenting on Cognitive Function in Patients with Carotid Artery Stenosis: A Prospective, 3-Month-Follow-Up Study
Source: PubMed Central journal article supplement — J Clin Neurol. 2015 Mar 26;11(2):149–56. doi: 10.3988/jcn.2015.11.2.149 (PMC4387480; doi:10.3988/jcn.2015.11.2.149), 2015-03-26
Supplement: jcn-11-149-s002.pdf [file jcn-11-149-s002.pdf]

**Supplementary Table 2.** Cognitive changes upon 3-month follow-up after carotid artery stenting in patients with MR perfusion defect versus without MR perfusion defect as compared to controls

| Neuropsychological test        | Baseline score                |                                |                   | Difference from baseline      |                                |                   | ANCOVA |
|--------------------------------|-------------------------------|--------------------------------|-------------------|-------------------------------|--------------------------------|-------------------|--------|
|                                | Perfusion defect (+)<br>(n=5) | Perfusion defect (-)<br>(n=14) | Control<br>(n=10) | Perfusion defect (+)<br>(n=5) | Perfusion defect (-)<br>(n=14) | Control<br>(n=10) | p      |
| K-MMSE                         | 24.6±4.4                      | 24.1±4.8                       | 26.5±2.6          | 2.6±4.0                       | 0.9±2.8                        | 1.1±2.2           | 0.449  |
| Digit span-forward             | 6.2±1.9                       | 6.1±1.5                        | 6.5±1.8           | 0.4±2.6                       | 0±1.7                          | 0±0.9             | 0.788  |
| Digit span-backward            | 3.6±2.1                       | 3.1±1.7                        | 3.6±1.0           | 0.4±1.8                       | 0.5±1.2                        | 0±1.2             | 0.797  |
| K-BNT                          | 9.0±3.5                       | 9.9±3.0                        | 12.2±1.4          | 0.4±1.3                       | 0.9±0.9                        | 1.0±1.7           | 0.477  |
| Calculation                    | 9.2±4.8                       | 8.9±4.3                        | 9.9±2.8           | 2.8±4.8                       | 0.1±1.7                        | 0±0.7             | 0.048  |
| ROCFT                          | 26.8±15.2                     | 24.7±12.6                      | 32.2±6.8          | 2.2±2.9                       | 2.3±5.4                        | 0.8±2.8           | 0.335  |
| Orientation                    | 5.6±0.9                       | 5.4±1.0                        | 5.7±0.5           | 0.4±0.9                       | 0.1±0.9                        | 0.3±0.5           | 0.654  |
| SVLT free recall               | 15.2±8.2                      | 10.8±7.0                       | 20.4±6.4          | 0±6.2                         | 3.1±6.7                        | 2.8±5.0           | 0.039  |
| SVLT delayed recall            | 4.0±2.9                       | 3.1±2.9                        | 5.6±3.7           | 0±2.6                         | 1.7±4.3                        | 1.7±2.3           | 0.304  |
| SVLT recognition               | 6.6±4.0                       | 5.1±3.2                        | 8.4±1.6           | 0.2±5.0                       | 1.1±3.0                        | 1.7±1.8           | 0.045  |
| ROCFT-immediate/delayed recall | 20.8±15.2                     | 21.0±16.7                      | 31.4±17           | 9.9±10.4                      | 5.6±7.1                        | 7.0±7.5           | 0.657  |
| ROCFT-recognition              | 5.0±4.5                       | 5.7±3.7                        | 7.3±2.5           | 0±3.6                         | 1.4±2.5                        | 1.2±2.7           | 0.108  |
| Contrasting program            | 2.2±1.3                       | 2.4±1.2                        | 2.8±0.6           | 0.8±1.3                       | 0.1±0.5                        | 0.2±0.6           | 0.176  |
| Go-no-go                       | 2.2±1.3                       | 2.4±1.2                        | 2.6±0.5           | 0.6±1.5                       | 0±1.1                          | 0±0.6             | 0.539  |
| Fist-edge-palm                 | 2.0±1.4                       | 2.2±1.0                        | 3.0±0             | 0.6±0.9                       | 0.4±0.9                        | 0±0               | 0.893  |
| Luria loop                     | 2.4±1.3                       | 2.6±1.1                        | 2.7±0.7           | 0±0                           | 0±1.1                          | 0.3±0.7           | 0.350  |
| Word fluency-animal            | 8.8±4.2                       | 12.0±4.8                       | 13.5±2.7          | 2.0±2.2                       | 1.0±4.3                        | 0.6±2.5           | 0.791  |
| Word fluency-phonemic          | 4.6±2.8                       | 4.1±4.6                        | 6.5±2.8           | 0±2.4                         | 0.6±4.2                        | 0±3.5             | 0.394  |
| Stroop test-color              | 12.0±6.7                      | 9.7±7.0                        | 15.7±2.9          | 3.7±2.3                       | 1.6±3.4                        | 1.1±3.0           | 0.335  |
| SNSB-D score                   | 149.2±75.1                    | 142.1±60.8                     | 193±37.8          | 20.8±32.9                     | 19.7±23.8                      | 17.3±12.2         | 0.983  |

ANCOVA: analysis of covariance, K-BNT: Korean version of the Boston Naming Test, K-MMSE: Korean version of the Mini Mental State Examination, ROCFT: Rey-Osterrieth Complex Figure Test, ROCFT-immediate/delayed recall: immediate/delayed recall domain of the ROCFT, ROCFT-recognition: recognition domain of the ROCFT, SNSB-D: Seoul Neuropsychological Screening Battery-Dementia version, SVLT: Seoul Verbal Learning Test.
