# Supplementary material for: Effect of Carotid Artery Stenting on Cognitive Function in Patients with Carotid Artery Stenosis: A Prospective, 3-Month-Follow-Up Study
Source: PubMed Central journal article supplement — J Clin Neurol. 2015 Mar 26;11(2):149–56. doi: 10.3988/jcn.2015.11.2.149 (PMC4387480; doi:10.3988/jcn.2015.11.2.149), 2015-03-26
Supplement: jcn-11-149-s003.pdf [file jcn-11-149-s003.pdf]

**Supplementary Table 3.** Cognitive changes between baseline and the 3-month follow-up after CAS in CS patients stratified according the CS laterality (i.e., left or right side) as compared to the controls

| Neuropsychological test        | Baseline score     |                  |                   | Difference from baseline |                  |                   | ANCOVA   |
|--------------------------------|--------------------|------------------|-------------------|--------------------------|------------------|-------------------|----------|
|                                | Right CS<br>(n=14) | Left CS<br>(n=8) | Control<br>(n=10) | Right CS<br>(n=14)       | Left CS<br>(n=8) | Control<br>(n=10) | <i>p</i> |
| K-MMSE                         | 25.9±4.3           | 23.0±4.7         | 26.5±2.6          | 0.4±2.3                  | 1.9±3.9          | 1.1±2.2           | 0.578    |
| Digit span-forward             | 6.5±1.7            | 5.4±1.1          | 6.5±1.8           | -0.6±1.3                 | 0.8±2.1          | 0±0.9             | 0.126    |
| Digit span-backward            | 3.5±2.0            | 2.9±1.1          | 3.6±1.0           | 0.1±1.4                  | 0.6±1.1          | 0±1.2             | 0.852    |
| K-BNT                          | 10.2±3.5           | 8.9±3.0          | 12.2±1.4          | 0.6±1.1                  | 0.6±1.2          | 1.0±1.7           | 0.801    |
| Calculation test               | 10.4±2.3           | 6.8±5.4          | 9.9±2.8           | 0.1±1.6                  | 2.3±3.8          | -0.1±0.7          | 0.131    |
| ROCFT                          | 29.0±9.5           | 22.5±16.5        | 32.2±6.8          | 1.6±5.1                  | 2.1±3.9          | 0.8±2.8           | 0.643    |
| Orientation test               | 5.7±0.8            | 5.1±1.0          | 5.7±0.5           | -0.1±0.5                 | 0.6±1.2          | 0.3±0.5           | 0.121    |
| SVLT-free recall               | 14.4±8.3           | 9.4±4.6          | 20.4±6.4          | 1.9±6.9                  | 2.6±6.1          | 2.8±5.0           | 0.124    |
| SVLT-delayed recall            | 4.4±3.1            | 1.9±1.6          | 5.6±3.7           | 1.6±4.4                  | 1.0±2.3          | 1.7±2.3           | 0.523    |
| SVLT-recognition               | 6.6±3.8            | 4.3±2.6          | 8.4±1.6           | 0.7±2.9                  | 1.4±4.0          | 1.7±1.8           | 0.079    |
| ROCFT-immediate/delayed recall | 26.0±17.7          | 19.5±16.8        | 31.4±17.0         | 5.9±11.4                 | 4.9±6.3          | 7.0±7.5           | 0.980    |
| ROCFT-recognition              | 6.9±2.9            | 4.4±4.7          | 7.3±2.5           | 1.0±2.4                  | 0.1±3.4          | 1.2±2.7           | 0.231    |
| Contrasting program            | 2.5±1.1            | 2.4±1.2          | 2.8±0.6           | 0.2±0.6                  | 0.4±1.1          | 0.2±0.6           | 0.705    |
| Go-no-go                       | 2.3±1.1            | 2.4±1.2          | 2.6±0.5           | 0.2±1.1                  | 0.1±1.2          | -0.1±0.6          | 0.820    |
| Fist-edge-palm                 | 2.4±0.9            | 2.0±1.2          | 3.0±0             | 0.4±0.9                  | 0.5±0.8          | 0±0               | 0.943    |
| Luria loop                     | 2.8±0.8            | 2.3±1.4          | 2.7±0.7           | -0.2±0.8                 | -0.4±1.1         | 0.3±0.7           | 0.355    |
| Word fluency-animal            | 12.9±4.8           | 9.1±3.7          | 13.5±2.7          | -0.6±2.9                 | 3.3±4.5          | 0.6±2.5           | 0.091    |
| Word fluency-phonemic          | 5.9±4.0            | 2.6±3.4          | 6.5±2.8           | -0.4±3.2                 | 0.8±4.3          | -1.1±3.5          | 0.814    |
| Stroop test-color              | 13.3±4.5           | 5.9±6.3          | 15.7±2.9          | 0.5±3.0                  | 3.3±4.1          | 1.1±3.0           | 0.370    |
| SNSB-D                         | 168.8±54.5         | 120.5±66.7       | 193.0±37.8        | 12.7±20.7                | 24.8±32.0        | 17.3±12.2         | 0.573    |

ANCOVA: analysis of covariance, CAS: carotid artery stenting, CS: carotid artery stenosis, K-BNT: Korean version of the Boston Naming Test, K-MMSE: Korean version of the Mini Mental State Examination, ROCFT: Rey-Osterrieth Complex Figure Test, ROCFT-immediate/delayed recall: immediate/delayed recall domain of the ROCFT, ROCFT-recognition: recognition domain of the ROCFT, SNSB-D: Seoul Neuropsychological Screening Battery-Dementia Version, SVLT: Seoul Verbal Learning Test.
